# Supplementary material for: The early molecular processes underlying the neurological manifestations of an animal model of Wilson's disease
Source: Royal Society of Chemistry journal article supplement (doi:10.1039/c3mt20243g), 2013-01-01
Supplement: c3mt20243g.pdf [file c3mt20243g.pdf]

Electronic Supplementary Material (ESI) for Metallomics  
This journal is © The Royal Society of Chemistry 2013

|              |                                                                                                                                                          |                      |                              |           |      |               |      |               |      |              |               |            |         |
|--------------|----------------------------------------------------------------------------------------------------------------------------------------------------------|----------------------|------------------------------|-----------|------|---------------|------|---------------|------|--------------|---------------|------------|---------|
| ILMN_1357722 | PREDICTED: Rattus norvegicus similar to Low-density lipoprotein receptor-related protein 4 precursor (LDLR dan) (predicted) (RGD1565014_predicted), mRNA | LOC498228            | <a href="#">XM_001096828</a> | Cluster 5 | 1.00 | 1.15          | 1.00 | <b>2.47</b>   | 0.00 | <b>3.96</b>  | GI_62662748-S | RGD1565014 | Unknown |
| ILMN_1353003 | PREDICTED: Rattus norvegicus similar to hypothetical protein DKFZp761N1114 (LOC498228), mRNA.                                                            | LOC498228            | <a href="#">XM_572444_1</a>  | Cluster 5 | 1.00 | 1.02          | 1.00 | 1.15          | 0.01 | <b>3.96</b>  | GI_52659305-S | LOC498228  | Unknown |
| ILMN_1368919 | PREDICTED: Rattus norvegicus similar to BC028663 protein (predicted) (RGD1563236_predicted), mRNA.                                                       | RGD1563236_predicted | <a href="#">XM_001071564</a> | Cluster 5 | 1.00 | 1.18          | 1.00 | 1.27          | 0.00 | <b>3.99</b>  | GI_62662463-S | RGD1563236 | Unknown |
| ILMN_1354352 | PREDICTED: Rattus norvegicus hypothetical LOC314472 (predicted) (LOC314472), mRNA.                                                                       | LOC314472            | <a href="#">XM_234564_3</a>  | Cluster 8 | 0.00 | <b>5.45</b>   | 0.45 | <b>3.21</b>   | 0.00 | <b>4.13</b>  | GI_62651291-S | LOC314472  | Unknown |
| ILMN_1367934 | PREDICTED: Rattus norvegicus similar to 6430514L14Rik protein (predicted) (RGD1311958_predicted), mRNA.                                                  | RGD1311958_predicted | <a href="#">XM_236376_4</a>  | Cluster 5 | 0.92 | -1.39         | 1.00 | 1.54          | 0.00 | <b>4.48</b>  | GI_62653872-S | FAM81A     | Unknown |
| ILMN_1367214 | Rattus norvegicus SNRPN upstream reading frame (Snurf), mRNA.                                                                                            | Snurf                | <a href="#">NM_130738_1</a>  | Cluster 3 | 0.01 | <b>-2.20</b>  | 1.00 | -1.28         | 0.00 | <b>4.57</b>  | GI_18543338-S | SNURF      | Unknown |
| ILMN_1376622 | Rattus norvegicus cytochrome P450, family 2, subfamily c, polypeptide 23 (Cyp2c23), mRNA.                                                                | Cyp2c23              | <a href="#">NM_001839_2</a>  | Cluster 7 | 0.00 | <b>-21.66</b> | 1.00 | <b>-2.01</b>  | 0.00 | <b>4.68</b>  | GI_24475717-A | CYP2C23    | Unknown |
| ILMN_1359615 | PREDICTED: Rattus norvegicus hsc70-like 4 (predicted) (Lyp4_predicted), mRNA.                                                                            | Lyp4_predicted       | <a href="#">XM_343697_3</a>  | Cluster 5 | 0.58 | 1.92          | 0.20 | -1.53         | 0.00 | <b>5.48</b>  | GI_52654507-S | ITZL1      | Unknown |
| ILMN_1375106 | Rattus norvegicus cytochrome P450, family 2, subfamily d, polypeptide 2 (Cyp2d2), mRNA.                                                                  | Cyp2d2               | <a href="#">NM_012730_1</a>  | Cluster 7 | 0.00 | <b>-32.78</b> | 1.00 | -1.55         | 0.00 | <b>5.59</b>  | GI_6978746-S  | CYP2D2     | Unknown |
| ILMN_1357366 | PREDICTED: Rattus norvegicus hypothetical gene supported by NM_016994 (LOC497841), mRNA.                                                                 | LOC497841            | <a href="#">XM_578384_1</a>  | Cluster 7 | 0.00 | <b>-28.28</b> | 1.00 | <b>-2.98</b>  | 0.00 | <b>5.05</b>  | GI_62718644-S | LOC497841  | Unknown |
| ILMN_1351728 | Rattus norvegicus alpha-2u globulin PGCL1 (LOC259246), mRNA.                                                                                             | LOC259246            | <a href="#">NM_147214_1</a>  | Cluster 3 | 1.00 | 1.30          | 0.00 | <b>-10.81</b> | 0.00 | <b>5.98</b>  | GI_22219449-S | LOC259246  | Unknown |
| ILMN_1371263 | PREDICTED: Rattus norvegicus similar to cat eye syndrome critical region 6 (LOC500307), mRNA.                                                            | LOC500307            | <a href="#">XM_575656_1</a>  | Cluster 5 | 0.26 | -1.65         | 1.00 | 1.18          | 0.00 | <b>6.31</b>  | GI_62648105-S | LOC500307  | Unknown |
| ILMN_165118  | PREDICTED: Rattus norvegicus similar to putative protein (SS487) (predicted) (RGD1310819_predicted), mRNA.                                               | RGD1310819_predicted | <a href="#">XM_237064_4</a>  | Cluster 5 | 1.00 | 1.36          | 1.00 | <b>2.48</b>   | 0.00 | <b>7.36</b>  | GI_62654933   | RGD1310819 | Unknown |
| ILMN_164895  | PREDICTED: Rattus norvegicus similar to MADS box transcription enhancer factor 2, polypeptide C (myocyte enhancer factor 2C) (LOC499495), mRNA.          | LOC499495            | <a href="#">XM_574820_1</a>  | Cluster 2 | 0.00 | <b>-9.24</b>  | 1.00 | -1.52         | 0.00 | <b>7.44</b>  | GI_62654294   | LOC499495  | Unknown |
| ILMN_1355066 | PREDICTED: Rattus norvegicus similar to KIAA1034-like DNA binding protein (LOC501145), mRNA.                                                             | LOC501145            | <a href="#">XM_576570_1</a>  | Cluster 5 | 1.00 | -1.20         | 1.00 | 1.67          | 0.00 | <b>8.36</b>  | GI_62655068-S | LOC501145  | Unknown |
| ILMN_1365636 | Rattus norvegicus cholecystokinin (Cck), mRNA.                                                                                                           | Cck                  | <a href="#">NM_012829_1</a>  | Cluster 5 | 0.14 | 1.97          | 1.00 | 1.83          | 0.00 | <b>8.38</b>  | GI_6978612-S  | CCK        | Unknown |
| ILMN_137378  | Rattus norvegicus WDNM1 homolog (LOC360228), mRNA.                                                                                                       | LOC360228            | <a href="#">NM_001004376</a> | Cluster 5 | 1.00 | -1.62         | 1.00 | -1.05         | 0.00 | <b>11.16</b> | GI_31172601-S | LOC360228  | Unknown |
| ILMN_137180  | PREDICTED: Rattus norvegicus similar to RIKEN cDNA 3110035E14 (predicted) (RGD1561849_predicted), mRNA.                                                  | RGD1561849_predicted | <a href="#">XM_001066866</a> | Cluster 2 | 0.00 | <b>-4.14</b>  | 1.00 | -1.04         | 0.00 | <b>11.21</b> | GI_62648550-S | RGD1561849 | Unknown |
| ILMN_137424  | Rattus norvegicus pregnancy-zone protein (Pzp), mRNA.                                                                                                    | Pzp                  | <a href="#">NM_145779_1</a>  | Cluster 7 | 0.00 | <b>-28.37</b> | 1.00 | -1.98         | 0.00 | <b>11.22</b> | GI_21955141-S | PZP        | Unknown |
| ILMN_1359044 | Rattus norvegicus esterase 1 (Est1), mRNA.                                                                                                               | Est1                 | <a href="#">NM_017004_1</a>  | Cluster 7 | 0.00 | <b>-34.81</b> | 1.00 | <b>-2.31</b>  | 0.00 | <b>12.38</b> | GI_57529186-S | ES1        | Unknown |
